# Supplementary material
Source: MDPI journal article supplement (https://www.mdpi.com/2075-4701/10/4/531)

## Article

# Recovery of Lead and Zinc from Zinc Plant Leach Residues by Concurrent Dissolution-Cementation Using Zero-Valent Aluminum in Chloride Medium

Marthias Silwamba <sup>1,2,\*</sup>, Mayumi Ito <sup>3</sup>, Naoki Hiroyoshi <sup>3</sup>, Carlito Baltazar Tabelin <sup>4</sup>, Ryota Hashizume <sup>1</sup>, Tomoki Fukushima <sup>1</sup>, Ilhwan Park <sup>3</sup>, Sanghee Jeon <sup>3</sup>, Toshifumi Igarashi <sup>3</sup>, Tsutomu Sato <sup>3</sup>, Meki Chirwa <sup>5</sup>, Kawawa Banda <sup>5</sup>, Imasiku Nyambe <sup>5</sup>, Hokuto Nakata <sup>6</sup>, Shouta Nakayama <sup>6</sup> and Mayumi Ishizuka <sup>6</sup>

<sup>1</sup> Division of Sustainable Resources Engineering, Graduate School of Engineering, Hokkaido University, Sapporo 060-8628, Japan

<sup>2</sup> Department of Metallurgy and Mineral Processing, School of Mines, The University of Zambia, P.O. Box 32379 Lusaka, Zambia

<sup>3</sup> Division of Sustainable Resources Engineering, Faculty of Engineering, Hokkaido University, Sapporo 060-8628, Japan

<sup>4</sup> School of Minerals and Energy Resources Engineering, The University of New South Wales, Sydney, NSW 2052, Australia

<sup>5</sup> IWRM Centre/Geology Department, School of Mines, The University of Zambia, P.O. Box 32379 Lusaka, Zambia

<sup>6</sup> Faculty of Veterinary Medicine, Hokkaido University, Kita 18, Nishi 9, Kita-Ku, Sapporo 060-0818, Japan

\* Correspondence: smarthias11@gmail.com or marthias.silwamba@unza.zm; Tel.: +81-80-8745-1805

Received: 2 April 2020; Accepted: 18 April 2020; Published: 20 April 2020

## Supplementary information

### 1. Thermodynamics Calculation of Dissolution PbCO<sub>3</sub> at Different Chloride (Cl<sup>-</sup>) Concentration and pH

To check the effects of Cl<sup>-</sup> concentration and pH on the dissolution of PbCO<sub>3</sub>, thermodynamics calculations were carried at experimental final pH values using the Geochemist's Workbench® with the MINTeq database as shown in Figure S2. As can be seen from Figure S2, pH has no effects on the dissolution of PbSO<sub>4</sub> but Cl<sup>-</sup> concentration. The corroborate with the chemical reaction (Equation S2)

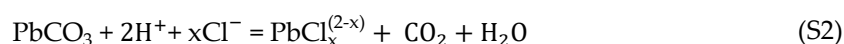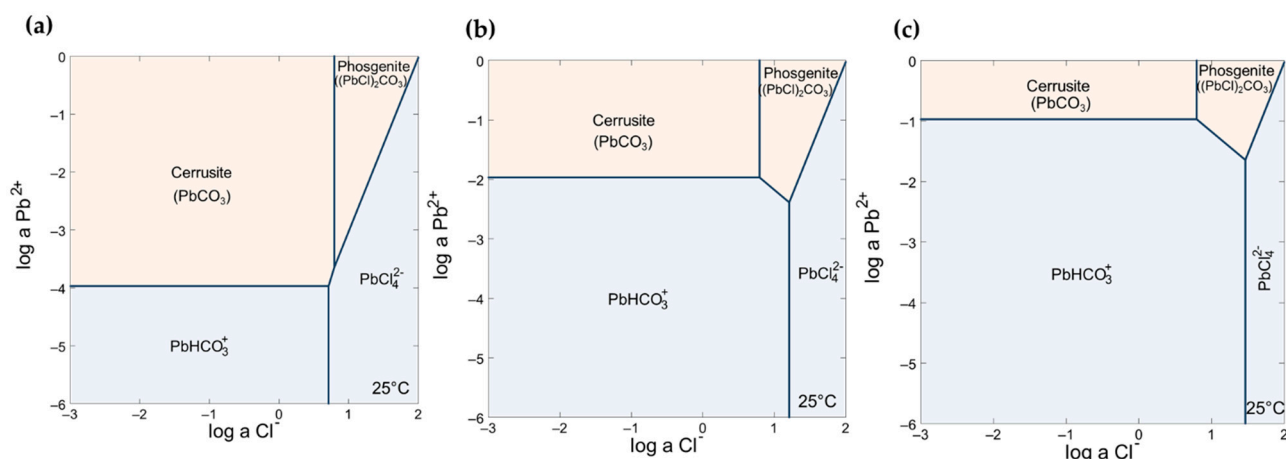

**Figure S1.** log-log activity of  $\text{Pb}^{2+}$  and  $\text{Cl}^-$  at 25 °C, 1.013 bars, and  $\text{CO}_3^{2-} = 10^{-5}$  M for (a) pH 4, (b) pH 2, and (c) pH 1 for 0.01, 0.05, and 0.1 M HCl (created using the Geochemist's Workbench® [1] with the MINTEQ database [2]).

## 2. XRD Analysis of the ZPLRs before and after the Treatment of ZPLRs by Concurrent Dissolution-Cementation Technique

Semi-quantitative analysis of ZPLRs before and after treatment by concurrent dissolution-cementation technique was carried out using XRD. Figure S3 shows the comparison of the XRD of the two said residues. Disappearance and reduction of the intensity of minerals such as anglesite, gypsum dihydrate, and cerussite, zinkosite were not after treating ZPLRs in the solution composed of 3 M NaCl and 0.05 M HCl.

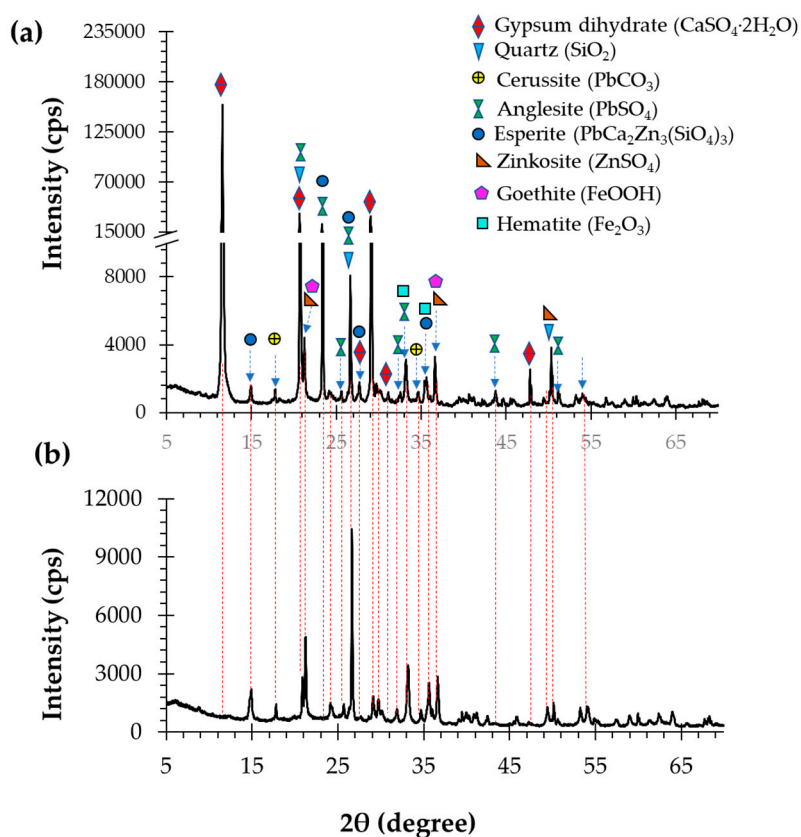

**Figure S2.** XRD pattern of (a) ZPLRs before treatment and (b) the residues obtained after treating ZPLRs by the concurrent dissolution-cementation technique in the solution composed 3 M NaCl and 0.05 M HCl.

## References

1. Bethke, C.M. *The Geochemist's Workbench—A User's Guide to Rxn, Act2, Tact, React, and Gtplot*. University of Illinois, Urbana, IL, USA, 2002.
2. Gustafsson, J.P. Visual MINTEQ Thermodynamic Databases in GWB Format. Available online: <https://vminteq.lwr.kth.se/> (accessed 23 March 2020).

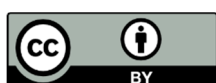

Supplement: s1 [file s1]
